# Supplementary material
Source: PubMed Central journal article supplement (PMC2825290)
Supplement: NIHMS169068-supplement-1_si_001.pdf [file NIHMS169068-supplement-1_si_001.pdf]

**Supplementary Table 1: First generation dorsomorphin analogs**

| Compound | R1                                                                                  | R2                                                                                  | Dorsalization<br>(EC100, $\mu\text{M}$ ) | ISV disruption<br>(EC50, $\mu\text{M}$ ) | Toxicity<br>(EC100, $\mu\text{M}$ ) | Remark                    |
|----------|-------------------------------------------------------------------------------------|-------------------------------------------------------------------------------------|------------------------------------------|------------------------------------------|-------------------------------------|---------------------------|
| 6K1      | 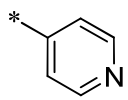   |    | Yes (1 $\mu\text{M}$ )                   | Yes (5 $\mu\text{M}$ )                   | Yes (20 $\mu\text{M}$ )             | Less selective            |
| 6E1      |    |    | Yes (10 $\mu\text{M}$ )                  | Yes (50 $\mu\text{M}$ )                  | No                                  | Not potent/ not selective |
| 6LP      |    |    | No (>50 $\mu\text{M}$ )                  | No (>50 $\mu\text{M}$ )                  | No                                  | Not bioactive             |
| 6LE      |   |   | Yes (5 $\mu\text{M}$ )                   | Yes (50 $\mu\text{M}$ )                  | No                                  | Selective, but not potent |
| 930      |  |  | Yes (1 $\mu\text{M}$ )                   | Yes (5 $\mu\text{M}$ )                   | No                                  | Not selective             |

|            |                                                                                     |                                                                                     |            |              |            |                      |
|------------|-------------------------------------------------------------------------------------|-------------------------------------------------------------------------------------|------------|--------------|------------|----------------------|
| 913        | 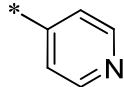   |    | Yes (1μM)  | Yes (2.5μM)  | Yes (20μM) | Toxic/ not selective |
| <b>91E</b> |    |    | Yes (2μM)  | Yes (2μM)    | Yes (5μM)  | Not selective        |
| 92Y        |    |    | Yes (25μM) | No (>50μM)   | No         | Not potent           |
| 6LK        |    |    | Yes (10μM) | Yes (50μM)   | No         | Not selective        |
| 91R        |   |    | No (>50μM) | No (>50μM)   | No         | Not bioactive        |
| 90J        |  |  | Yes (20μM) | Yes (25μM)   | Yes (50μM) | Toxic/ not selective |
| 90H        |  |  | Yes (1μM)  | Stump at 5μM | Yes (5μM)  | Toxic                |

|     |                                                                                     |                                                                                     |            |            |            |                     |
|-----|-------------------------------------------------------------------------------------|-------------------------------------------------------------------------------------|------------|------------|------------|---------------------|
| 90G | 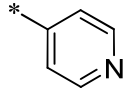   |    | No (>50μM) | No (>50μM) | No         | Not bioactive       |
| 6B6 |    |    | Yes (5μM)  | Yes (2μM)  | Yes (10μM) | Not selective/toxic |
| 6BA |    |    | Yes (5μM)  | Yes (20μM) | Yes (20μM) | Not selective       |
| 6KM |    |    | Yes (10μM) | Yes (50μM) | No         | Not selective       |
| 69N |    |   | Yes (5μM)  | Yes (20μM) | No         | Not selective       |
| 69W |  |  | Yes (10μM) | Yes (10μM) | No         | Not selective       |
| 6L1 |  |  | Yes (10μM) | No (>50μM) | No         | Not potent          |

|     |                                                                                   |                                                                                   |            |            |    |               |
|-----|-----------------------------------------------------------------------------------|-----------------------------------------------------------------------------------|------------|------------|----|---------------|
| 90U | 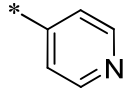 |  | No (>50μM) | No (>50μM) | No | Not bioactive |
| 92M |  |  | No (>50μM) | No (>50μM) | No | Not bioactive |
