# Supplementary material
Source: PubMed Central journal article supplement (PMC2825290)
Supplement: NIHMS169068-supplement-2_si_002.pdf [file NIHMS169068-supplement-2_si_002.pdf]

**Supplementary Table 2: Second-generation dorsomorphin analogs**

| Compound    | R1                                                                                  | R2                                                                                  | Dorsalization | ISV disruption | toxicity/<br>additional<br>defects | Remark                                        |
|-------------|-------------------------------------------------------------------------------------|-------------------------------------------------------------------------------------|---------------|----------------|------------------------------------|-----------------------------------------------|
| BAC         | 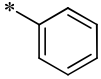   | <chem>CH3O*</chem>                                                                  | No (>50μM)    | No (>50μM)     | No                                 | Not bioactive                                 |
| <b>DMH4</b> |    |    | No (>50μM)    | Yes (1μM)      | No                                 | Potent and selective VEGF signaling inhibitor |
| BY1         |    |    | Yes (25μM)    | Yes (10μM)     | Yes (50μM)                         | toxic/not selective                           |
| BX4         |    |    | No (>50μM)    | Yes (10μM)     | No                                 | Not very potent for VEGF                      |
| BAE         |   | <chem>H-O*</chem>                                                                   | No (>50μM)    | No (>50μM)     | No                                 | Not bioactive                                 |
| BAJ         |  |  | No (>50μM)    | No (>50μM)     | No                                 | Not bioactive                                 |

|     |                                                                                     |                                                                                     |             |            |              |                                |
|-----|-------------------------------------------------------------------------------------|-------------------------------------------------------------------------------------|-------------|------------|--------------|--------------------------------|
| BA1 | 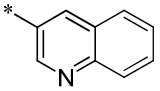   |    | Yes (25μM)  | No (>50μM) | Yes (50μM)   | Toxic/ not potent              |
| BB2 |    |    | No (>50μM)  | No (>50μM) | No           | Not bioactive                  |
| BAQ |    |    | dead at 5μM | Yes (10μM) | Yes (10μM)   | Toxic/not selective            |
| C02 |    |    | No (>50μM)  | Yes (10μM) | No           | Not very potent VEGF inhibitor |
| C00 |    |    | No (>50μM)  | No (>50μM) | No           | Not bioactive                  |
| BXD |   |   | No (>50μM)  | No (>50μM) | Sick at 50μM | Not bioactive                  |
| AJC |  |  | No (>50μM)  | No (>50μM) | No           | Not bioactive                  |

|     |                                                                                     |                                                                                     |            |            |            |                  |
|-----|-------------------------------------------------------------------------------------|-------------------------------------------------------------------------------------|------------|------------|------------|------------------|
| AKU |    |    | Yes (25μM) | No         | Yes (25μM) | Toxic/not potent |
| ABY |    |    | No (>50μM) | No (>50μM) | No         | Not bioactive    |
| AEY |    |    | Yes (25μM) | No         | Yes (25μM) | Toxic/not potent |
| AE4 |    |    | No (>50μM) | No (>50μM) | No         | Not bioactive    |
| AJ5 |    |    | No (>50μM) | No (>50μM) | No         | Not bioactive    |
| AJD |   |    | No (>50μM) | No (>50μM) | No         | Not bioactive    |
| A3N |  |  | No (>50μM) | No (>50μM) | No         | Not bioactive    |

|     |                                                                                     |                                                                                     |              |              |            |                     |
|-----|-------------------------------------------------------------------------------------|-------------------------------------------------------------------------------------|--------------|--------------|------------|---------------------|
| A4B |    |    | No (>50μM)   | No (>50μM)   | Yes (25μM) | Toxic/Not bioactive |
| AJH |    |    | Yes (25μM)   | Yes (1μM)    | No         | not selective       |
| AJ7 |    |    | Yes (10μM)   | Yes (2.5μM)  | Yes (5μM)  | Toxic/not selective |
| A53 |    |    | Yes (12.5μM) | Yes (12.5μM) | Yes (25μM) | Toxic/not selective |
| A4F |    |    | No (>50μM)   | No (>50μM)   | No         | Not bioactive       |
| A45 |   |   | No (>50μM)   | No (>50μM)   | No         | Not bioactive       |
| AJN |  |  | Yes (2.5μM)  | Yes (2.5μM)  | Yes (5μM)  | Toxic/not selective |

|     |                                                                                     |                                                                                     |            |            |            |                        |
|-----|-------------------------------------------------------------------------------------|-------------------------------------------------------------------------------------|------------|------------|------------|------------------------|
| F93 | 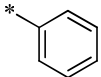   |    | No (>50μM) | No (>50μM) | No         | Not bioactive          |
| F9T |    |    | No (>50μM) | No (>50μM) | No         | Not bioactive          |
| FAD |    |    | No (>50μM) | No (>50μM) | No         | Not bioactive          |
| F9R |    |    | No (>50μM) | No (>50μM) | No         | Not bioactive          |
| FAF |    |    | Yes (25μM) | No (>50μM) | Yes (50μM) | Toxic/Not potent       |
| F9G |   |   | Yes (25μM) | No (>50μM) | Yes (50μM) | Toxic/Not potent       |
| FAT |  |  | Yes (25μM) | Yes (5μM)  | Yes (50μM) | Toxic and nonselective |

|      |                                                                                     |                                                                                     |             |            |             |                              |
|------|-------------------------------------------------------------------------------------|-------------------------------------------------------------------------------------|-------------|------------|-------------|------------------------------|
| FA6  | 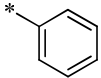   |    | Yes (25μM)  | Yes (5μM)  | Yes (50μM)  | Toxic and nonselective       |
| F9F  |    |    | No (>50μM)  | No (>50μM) | No          | Not bioactive                |
| FA4  |    |    | No (>50μM)  | No (>50μM) | No          | Not bioactive                |
| FB1  |    |    | No (>50μM)  | No (>50μM) | No          | Not bioactive                |
| FB0  |    |    | No (>50μM)  | No (>50μM) | No          | Not bioactive                |
| DMH2 |   |   | Yes (0.1μM) | No (>50μM) | Yes (25μM)  | Very potent BMP inhibitor    |
| DMH3 |  |  | Yes (1μM)   | No (>50μM) | No (>50 μM) | Very selective BMP inhibitor |

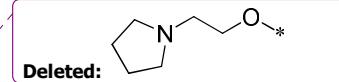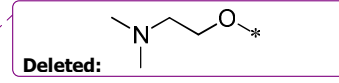

|             |                                                                                                                  |                                                                                                             |             |            |            |                                         |
|-------------|------------------------------------------------------------------------------------------------------------------|-------------------------------------------------------------------------------------------------------------|-------------|------------|------------|-----------------------------------------|
| <b>DMH1</b> | 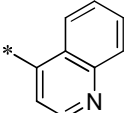<br><chem>*c1ccc2ncncc12</chem> | <br><chem>CC(C)COC*</chem> | Yes (0.2μM) | No (>50μM) | No (>50μM) | Very potent and selective BMP inhibitor |
|-------------|------------------------------------------------------------------------------------------------------------------|-------------------------------------------------------------------------------------------------------------|-------------|------------|------------|-----------------------------------------|
