# Supplementary material
Source: PubMed Central journal article supplement (PMC2825290)
Supplement: NIHMS169068-supplement-7_si_007.pdf [file NIHMS169068-supplement-7_si_007.pdf]

## Supporting Information Figure Legends

**Fig. S1.** Dorsomorphin and the SAR analysis of the pyrazolo[1,5-*a*]pyrimidine core structure.

**Fig. S2.** Dorsomorphin (DM), DMH2 and DMH3 inhibited BMP signaling in a dose dependent manner in a BMP-responsive-luciferase (BR-Luc) reporter assay. RLU, relative luciferase units.

**Fig. S3.** DMH1 inhibited the induction of the BMP-responsive-luciferase reporter expression by the constitutively active ALK2 (CaAlk2) and ALK3 (CaAlk3) but not by the constitutively active ALK6 (CaAlk6).
