# Supplementary material
Source: PubMed Central journal article supplement (PMC2825290)

**Figure S1**

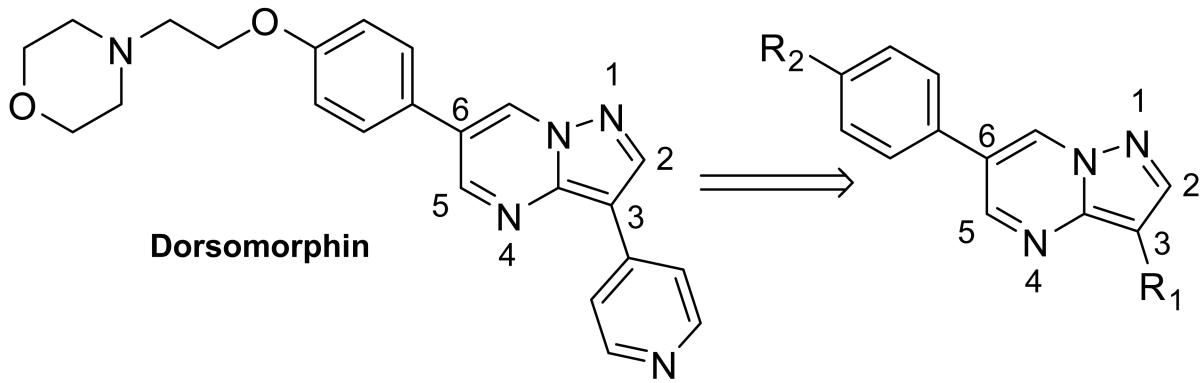

Supplement: NIHMS169068-supplement-4_si_004.pdf [file NIHMS169068-supplement-4_si_004.pdf]

# Figure S3

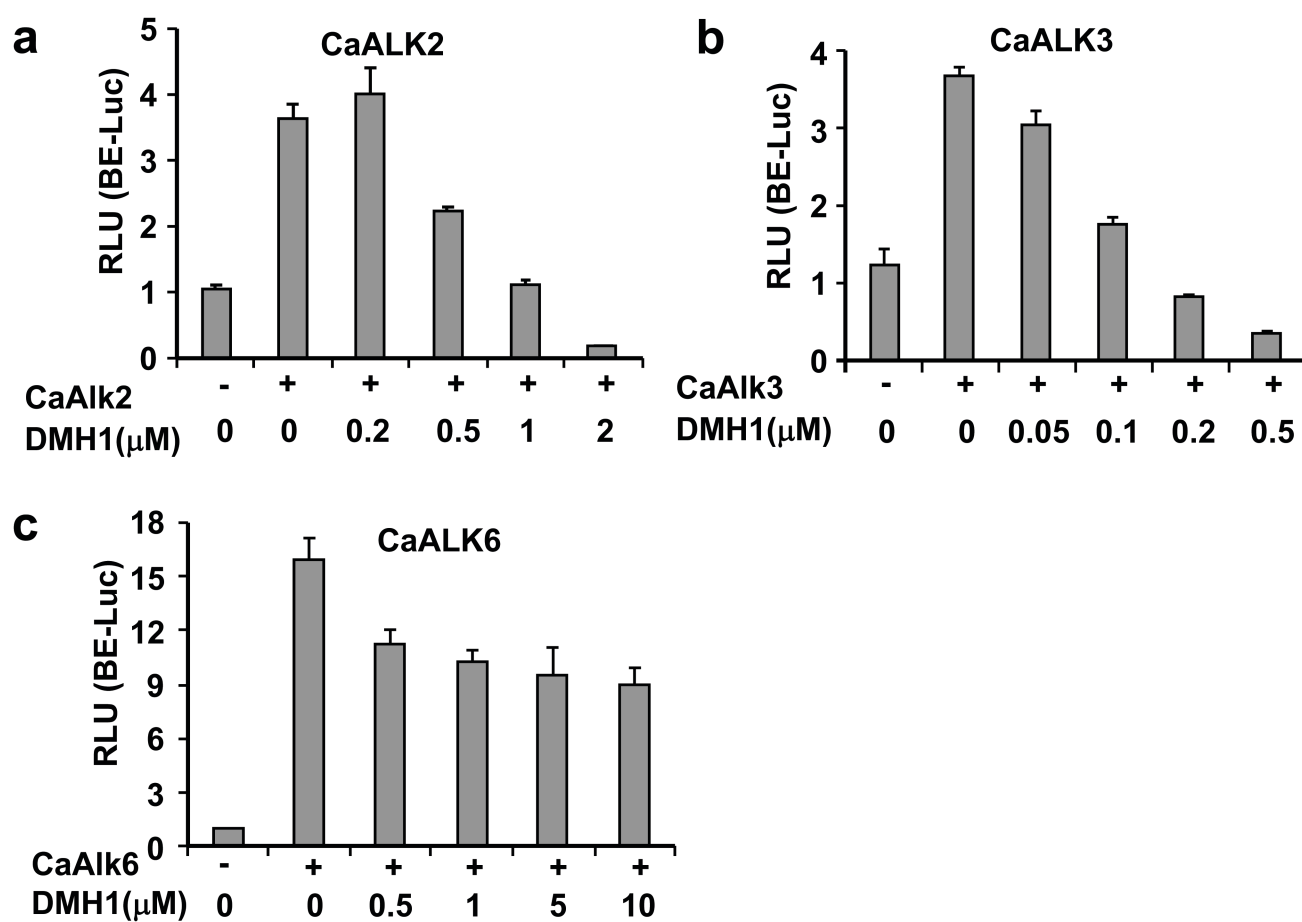

Supplement: NIHMS169068-supplement-6_si_006.pdf [file NIHMS169068-supplement-6_si_006.pdf]
